# Supplementary material
Source: Springer Nature journal article supplement (http://www.springermedizin.de/resource/supplementary/13195_2011_71_MOESM2_ESM.pdf/9688688)

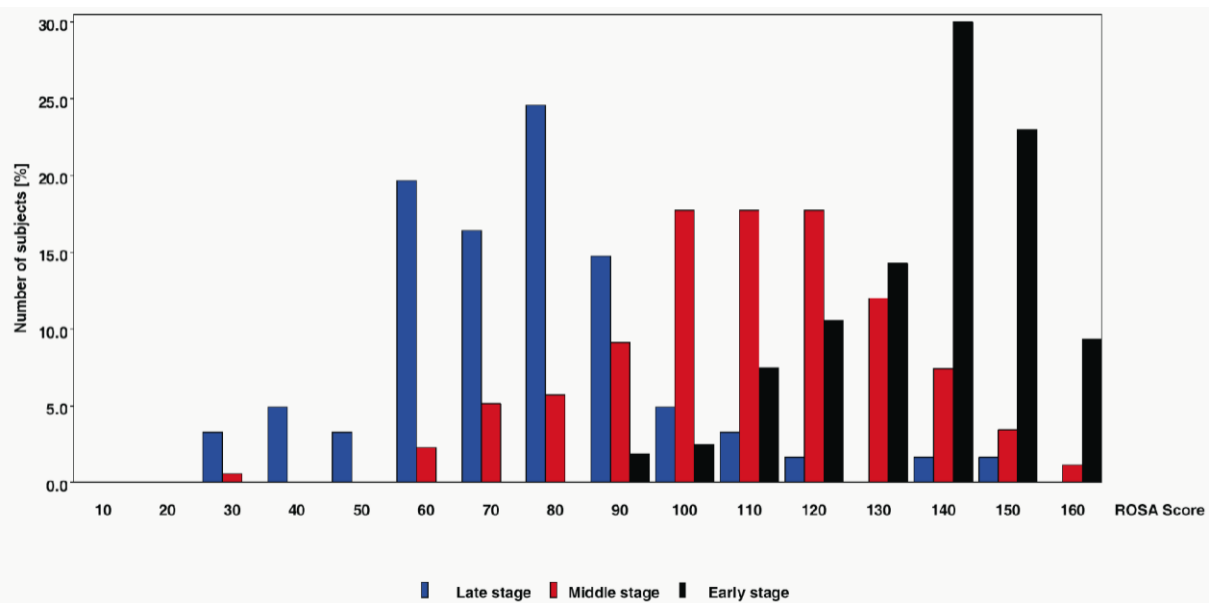

Supplement: MOESM2 [file 9688688]
